# Supplementary material for: Muscle–tendon-related abnormalities detected by ultrasonography are common in symptomatic hip dysplasia
Source: Springer Nature journal article supplement (doi:10.1007/s00402-018-2947-4), 2018-05-04
Supplement: MOESM2 [file 15739346]

Paper: Muscle-tendon-related abnormalities detected by ultrasonography are common in symptomatic hip dysplasia

Julie Sandell Jacobsen, MSc; Lars Bolvig, MD; Per Hölmich, DMSc; Kristian Thorborg, PhD; Stig Storgaard Jakobsen PhD, Kjeld Søballe, PhD, Inger Mechlenburg, PhD

Journal: Archives of Orthopaedic and Trauma Surgery

Corresponding author: Julie Sandell Jacobsen, MSc, Department of Physiotherapy, Faculty of Health Sciences,

VIA University College, Hedeager 2, DK-8200 Aarhus N, Denmark

E-mail: jsaj@via.dk

| **Table 1. Intra-rater reliability of the ultrasound examination (n=50)** | | | |  |
| --- | --- | --- | --- | --- |
| Tissue | Agreement (%) | Kappa-coefficient | Interpreted agreement | |
| Iliopsoas tendon | 82 | 0.64 | Substantial | |
| Glut. med./min. tendons | 92 | 0.70 | Substantial | |
| Adductor longus tendon | 82 | 0.64 | Substantial | |
| Hamstring tendons | 84 | 0.60 | Moderate | |
| Pubic symphysis | 90 | 0.59 | Moderate | |
| Acetabular labrum | 76 | 0.51 | Moderate | |
| Agreement reported as percentage agreement, kappa-coefficient and interpreted agreement according to Landis (1977). Abbreviations: glut. med./min. (gluteus medius/minimus). | | | | |

| **Table 2. Inter-rater reliability of the ultrasound examination (n=50)** | | | |  |
| --- | --- | --- | --- | --- |
| Tissue | Agreement (%) | Kappa-coefficient | Interpreted agreement | |
| Iliopsoas tendon | 73 | 0.46 | Moderate | |
| Glut. med./min. tendons | 84 | 0.34 | Fair | |
| Adductor longus tendon | 64 | 0.29 | Fair | |
| Hamstring tendons | 74 | 0.42 | Moderate | |
| Pubic symphysis | 68 | 0.19 | Slight | |
| Acetabular labrum | 67 | 0.35 | Fair | |
| Agreement between rater A and Rater B reported as percent agreement, kappa-coefficient and interpreted agreement according to Landis (1977). Abbreviations: glut. med./min. (gluteus medius/minimus). | | | | |
